# Supplementary material for: High-Fiber, Whole-Food Dietary Intervention Alters the Human Gut Microbiome but Not Fecal Short-Chain Fatty Acids
Source: PubMed Central journal article supplement (PMC8546969; doi:10.1128/msystems.00115-21), 2021-03-16
Supplement: msystems.00115-21-sf004.pdf [file msystems.00115-21-sf004.pdf]

A

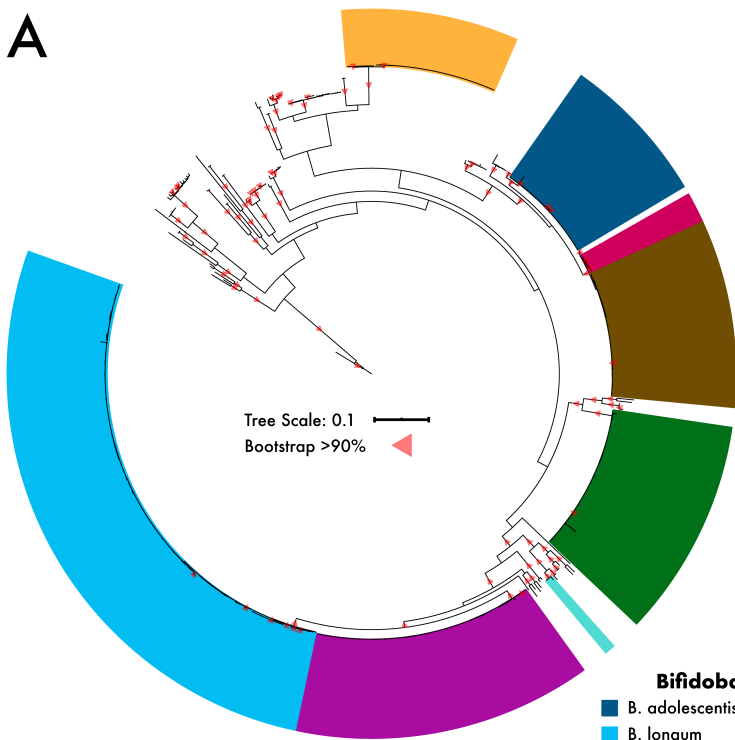

B

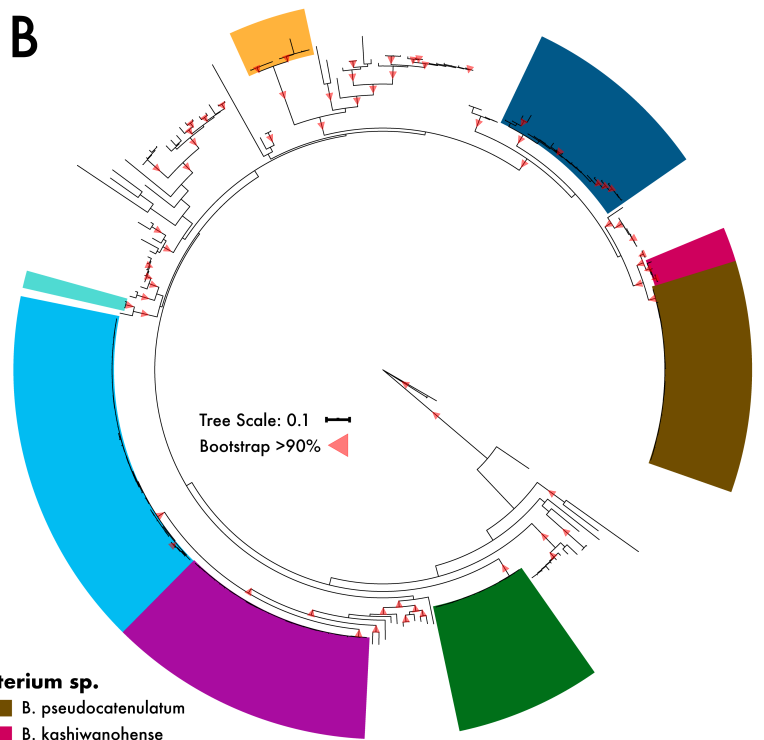

**Bifidobacterium sp.**

- B. adolescentis
- B. longum
- B. bifidum
- B. breve
- B. pseudocatenulatum
- B. kashiwanohense
- B. animalis
- B. angulatum
