# Supplementary material for: High-Fiber, Whole-Food Dietary Intervention Alters the Human Gut Microbiome but Not Fecal Short-Chain Fatty Acids
Source: PubMed Central journal article supplement (PMC8546969; doi:10.1128/msystems.00115-21), 2021-03-16

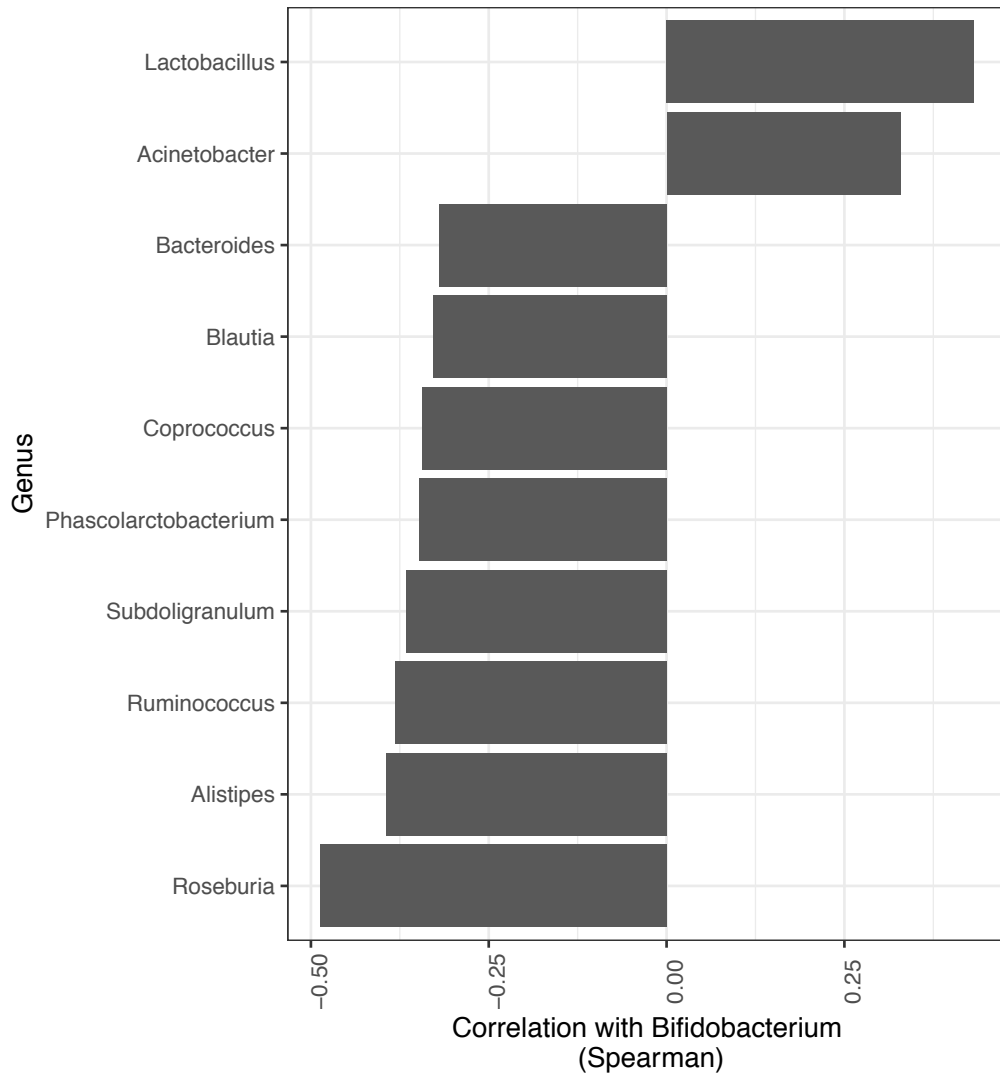

Supplement: msystems.00115-21-sf005.pdf [file msystems.00115-21-sf005.pdf]
