# Supplementary material for: High-Fiber, Whole-Food Dietary Intervention Alters the Human Gut Microbiome but Not Fecal Short-Chain Fatty Acids
Source: PubMed Central journal article supplement (PMC8546969; doi:10.1128/msystems.00115-21), 2021-03-16

A

Carbohydrate Active Enzymes

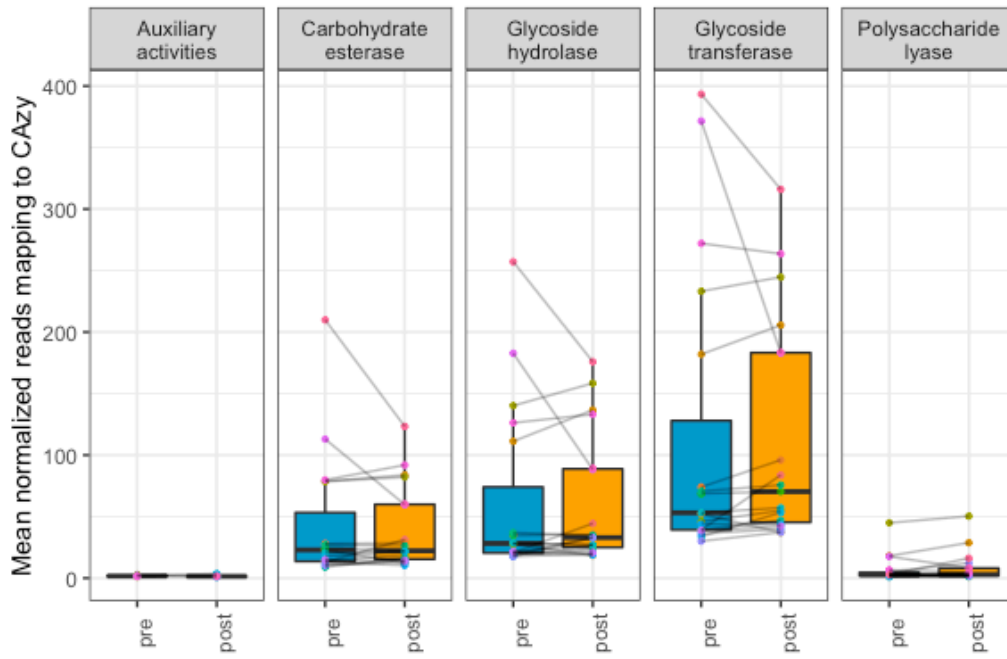

| Enzyme_Class          | read_count | distinct_enzymes | distinct_Families |
|-----------------------|------------|------------------|-------------------|
| Auxiliary activities  | 48         | 5                | 5                 |
| Carbohydrate esterase | 91406      | 46               | 46                |
| Glycoside hydrolase   | 670165     | 185              | 109               |
| Glycoside transferase | 187298     | 39               | 39                |
| Polysaccharide lyase  | 11335      | 28               | 15                |

B

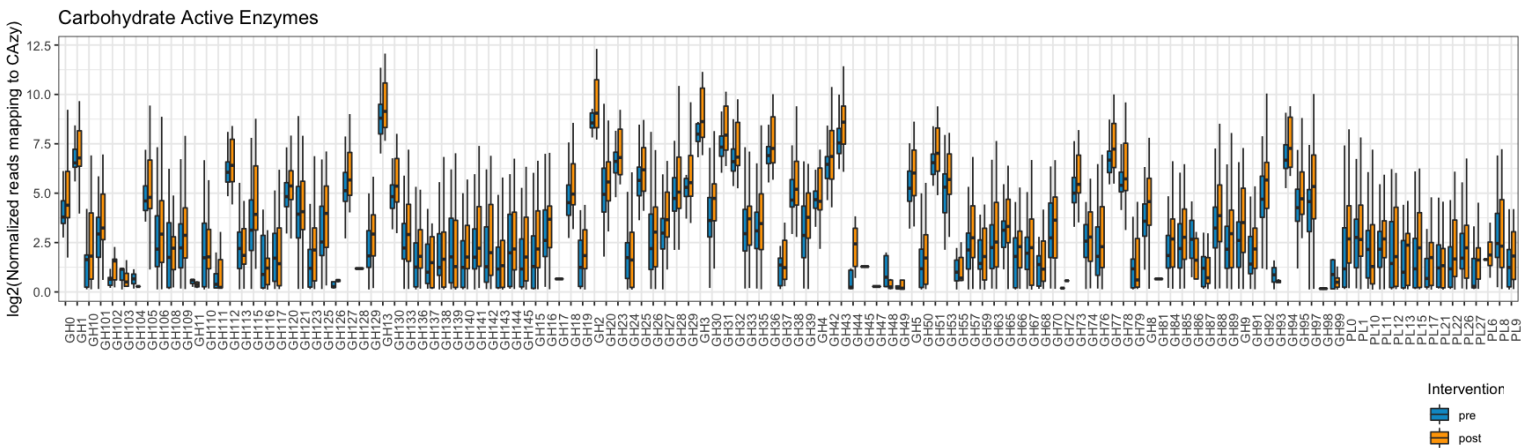

Supplement: msystems.00115-21-sf006.pdf [file msystems.00115-21-sf006.pdf]
